# Supplementary material for: Formulation and evaluation of β-cyclodextrin-mediated inclusion complexes of isoniazid scaffolds: molecular docking and in vitro assessment of antitubercular properties
Source: Royal Society of Chemistry journal article supplement (doi:10.1039/c9nj06351j), 2020-01-01
Supplement: c9nj06351j1.pdf [file c9nj06351j1.pdf]

## Formulation and Evaluation of $\beta$ -Cyclodextrin-mediated Inclusion Complexes of Isoniazid Scaffolds: Molecular Docking and *In Vitro* Assessment of Antitubercular Properties

Lincy Tom, Christy Rosaline Nirmal, Azger Dusthacker, B. Mahizhaveni and M.R.P. Kurup

**Table S1.** Changes in the chemical shifts of pure  $\beta$ -CD, HBIH/BDIH and  $\beta$ -CD inclusion complexes

| Protons    | $\beta$ -CD | $\beta$ -CD/HBIH | $\beta$ -CD/BDIH | HBIH/BDIH |
|------------|-------------|------------------|------------------|-----------|
| H-1        | 5.72        | 5.72             | 5.72             | -         |
| H-2        | 3.35        | 3.35             | 3.35             | -         |
| H-3        | 3.66        | 3.65             | 3.65             | -         |
| H-4        | 3.33        | 3.33             | 3.33             | -         |
| H-5        | 3.59        | 3.57             | 3.57             | -         |
| H-6        | 3.63        | 3.63             | 3.63             | -         |
| O-H (HBIH) | -           | 11.86            | -                | 11.88     |
| N-H (HBIH) | -           | 3.33             | -                | 3.35      |
| N-H (BDIH) | -           | -                | 3.33             | 3.34      |

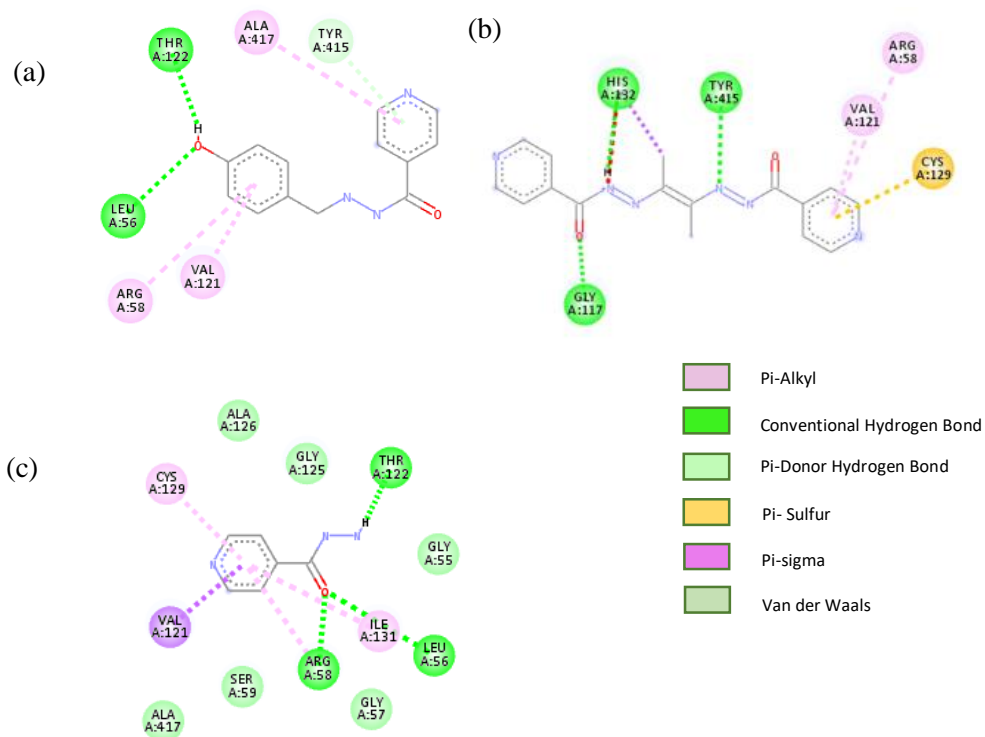

**Fig S1.** 2D interaction diagram of HBIH (a), BDIH (b) and IH (c) with DprE1.

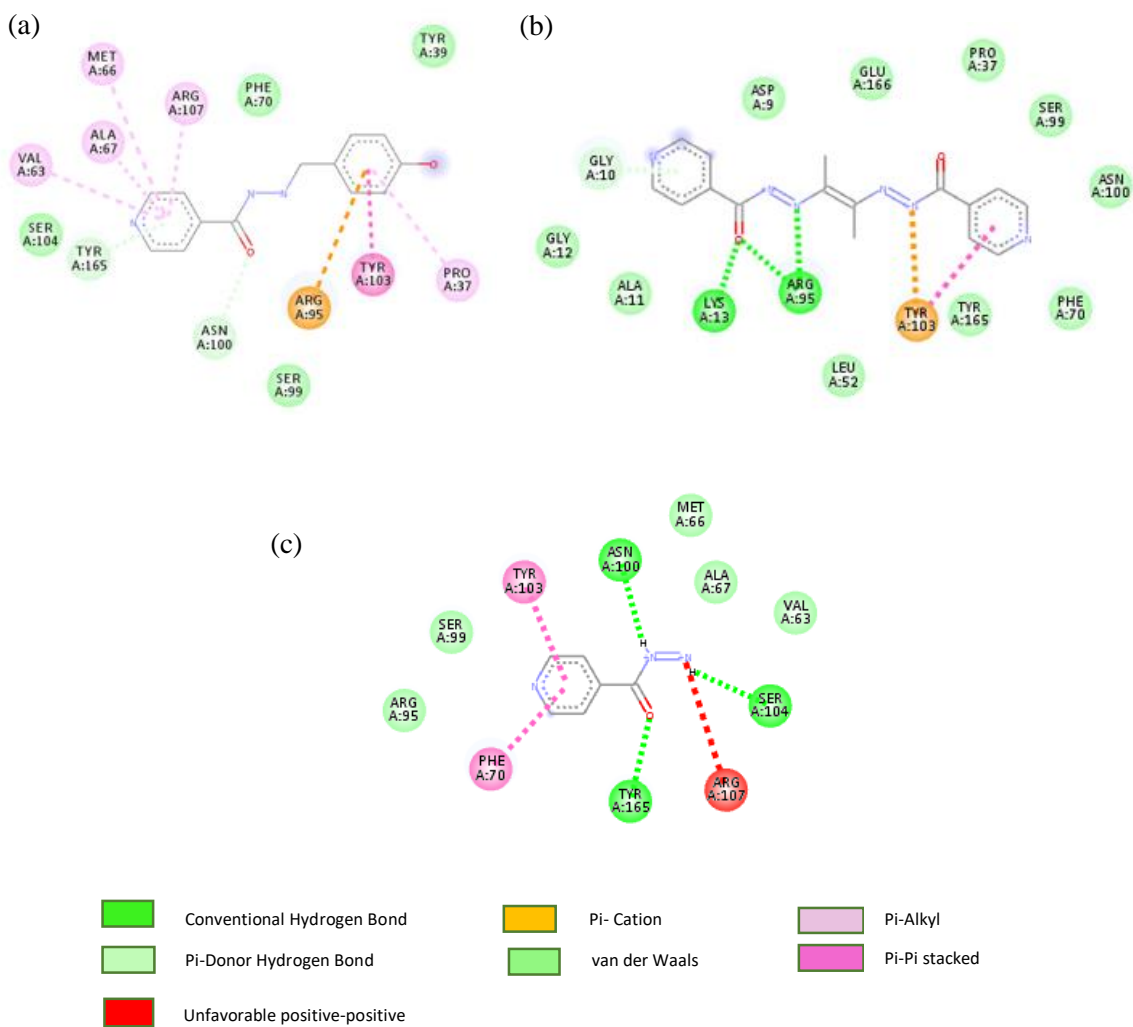

**Fig S2.** 2D interaction diagram of HBIH (a), BDIH (b) and IH (c) with TMPKinase.

**Table S2.** Preliminary anti-TB screening results for HBIH and BDIH

|      | Concentration ( $\mu\text{g/mL}$ ) | Percentage of Inhibition |
|------|------------------------------------|--------------------------|
| HBIH | 100                                | 85                       |
|      | 500                                | 81                       |
| BDIH | 100                                | 94                       |
|      | 500                                | 76                       |

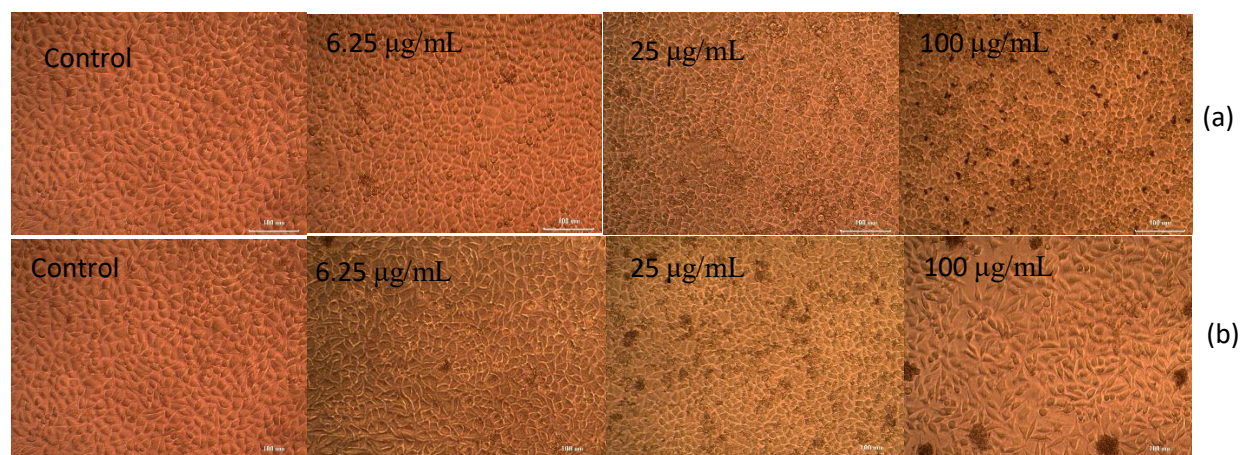

**Fig. S3.** Phase-contrast microscopy images of L929 fibroblast cell lines after incubation for 24 h with (a)  $\beta$ -CD/HBIH and (b)  $\beta$ -CD/BDIH at different concentrations 6.25,25,100  $\mu$ g/mL. Positive control cells were treated with DMSO. The dark spots indicates apoptotic cells (scale: 100  $\mu$ m).

**Table S3.** Molecular docking analysis of HBIH, BDIH and IH

| Target                                                   | DprE1           |                           |                         | Thymidine Monophosphate Kinase |                |                            |
|----------------------------------------------------------|-----------------|---------------------------|-------------------------|--------------------------------|----------------|----------------------------|
|                                                          | 4FDN            |                           |                         | 1W2G                           |                |                            |
| Target PDB id                                            | 4FDN            |                           |                         | 1W2G                           |                |                            |
| Ligand                                                   | HBIH            | BDIH                      | IH                      | HBIH                           | BDIH           | IH                         |
| Binding Energy (kcal/mol)                                | -7.34           | -7.99                     | -5.18                   | -6.63                          | -7.41          | -5.10                      |
| Inhibitory Constant                                      | 4.20 $\mu$ M    | 1.38 $\mu$ M              | 16.65 $\mu$ M           | 13.76 $\mu$ M                  | 3.73 $\mu$ M   | 18.86 $\mu$ M              |
| Internal Energy (kcal/mol)                               | -8.53           | -9.48                     | 0.02                    | -7.83                          | -8.90          | -0.24                      |
| Torsional Energy (kcal/mol)                              | 1.19            | 1.49                      | 0.60                    | 1.19                           | 1.49           | 0.60                       |
| Electrostatic Energy (kcal/mol)                          | -0.14           | -0.15                     | -0.13                   | -0.11                          | -0.52          | -0.16                      |
| Unbound Extended Energy (kcal/mol)                       | -0.20           | -0.61                     | 0.02                    | -0.20                          | -0.60          | -0.24                      |
| Hydrogen bonding Interactions                            | 2               | 3                         | 3                       | 0                              | 3              | 3                          |
| Interacting Residues                                     | THR 122, LEU 56 | HIS 132, TYR 415, GLY 117 | ARG 58, LEU 56, THR 122 | -                              | LYS 13, ARG 95 | ASN 100, SER 104, TYR 165, |
| VanderWaal's Hydrogen bond Desolvation Energy (kcal/mol) | -8.39           | -9.33                     | -5.65                   | -7.71                          | -8.38          | -5.54                      |
